# Supplementary material for: Mapping the Transglycosylation Relevant Sites of Cold-Adapted β-d-Galactosidase from Arthrobacter sp. 32cB
Source: MDPI journal article supplement (doi:10.3390/ijms21155354), 2020-07-28
Supplement: s1 [file s1]

## Supplementary materials

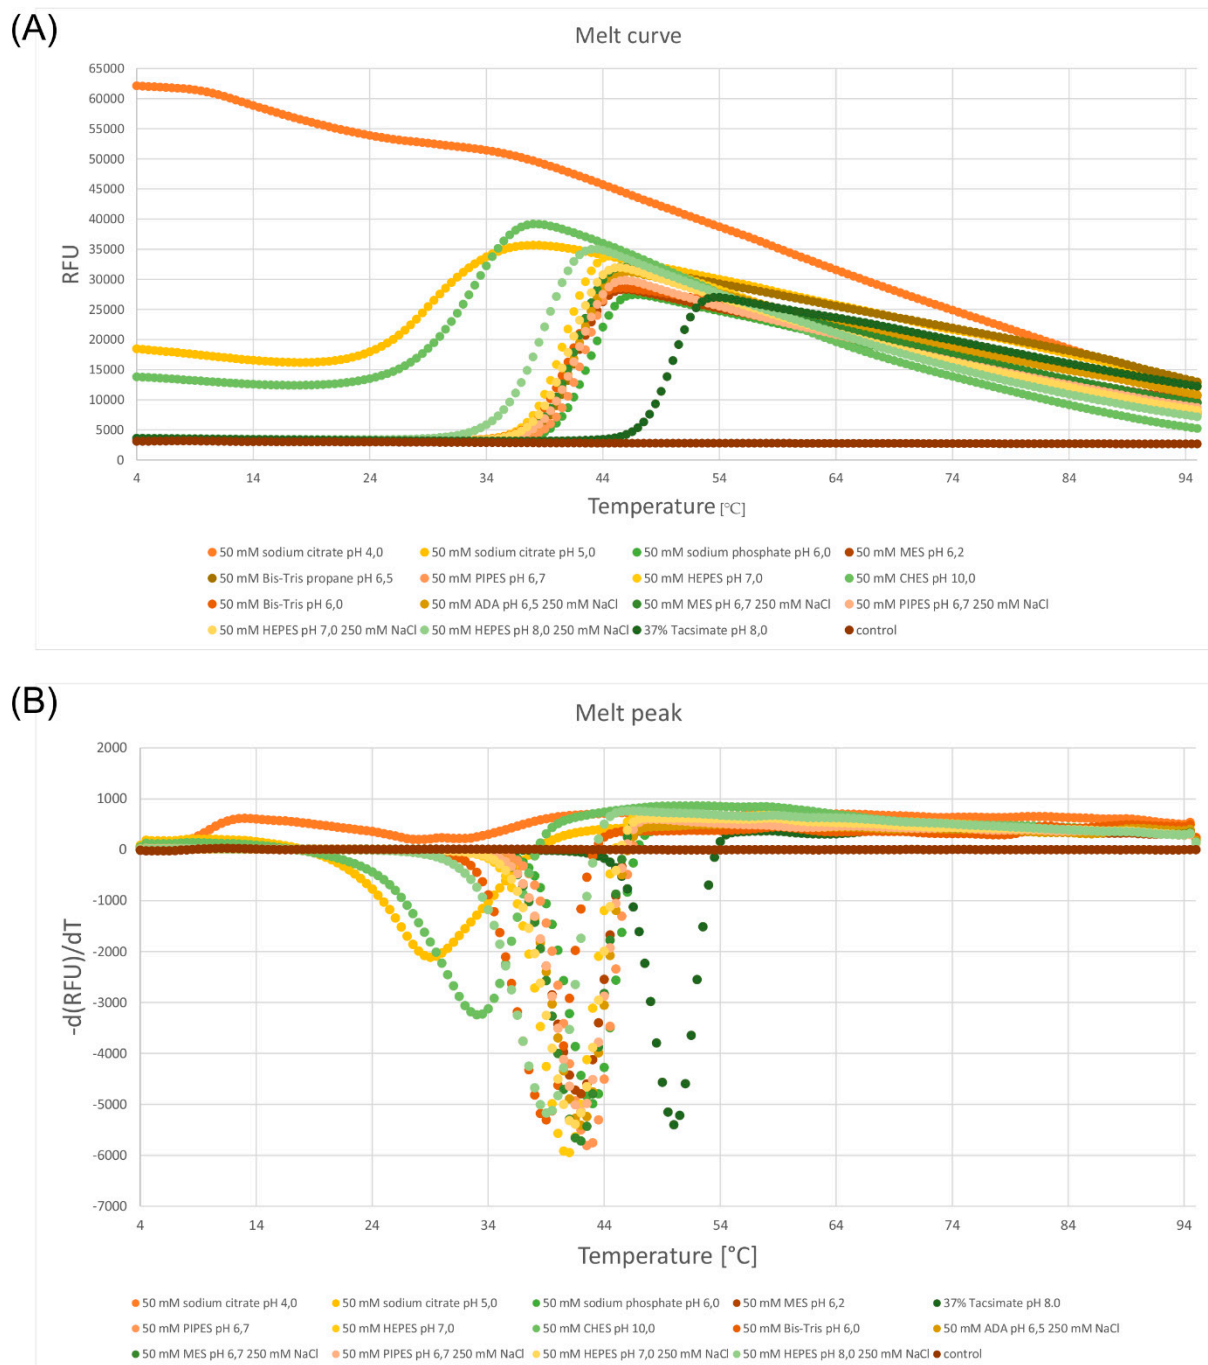

**Figure S1.** Selected TSA data and analysis for ArthβDG\_D207A mutant. (A) Thermo-fluor-base protein-unfolding curves of ArthβDG\_D207A. (B) The melting peak  $T_m$  identified by plotting the first derivative of the fluorescence emission as a function of temperature ( $-d(\text{RFU})/dT$ ).

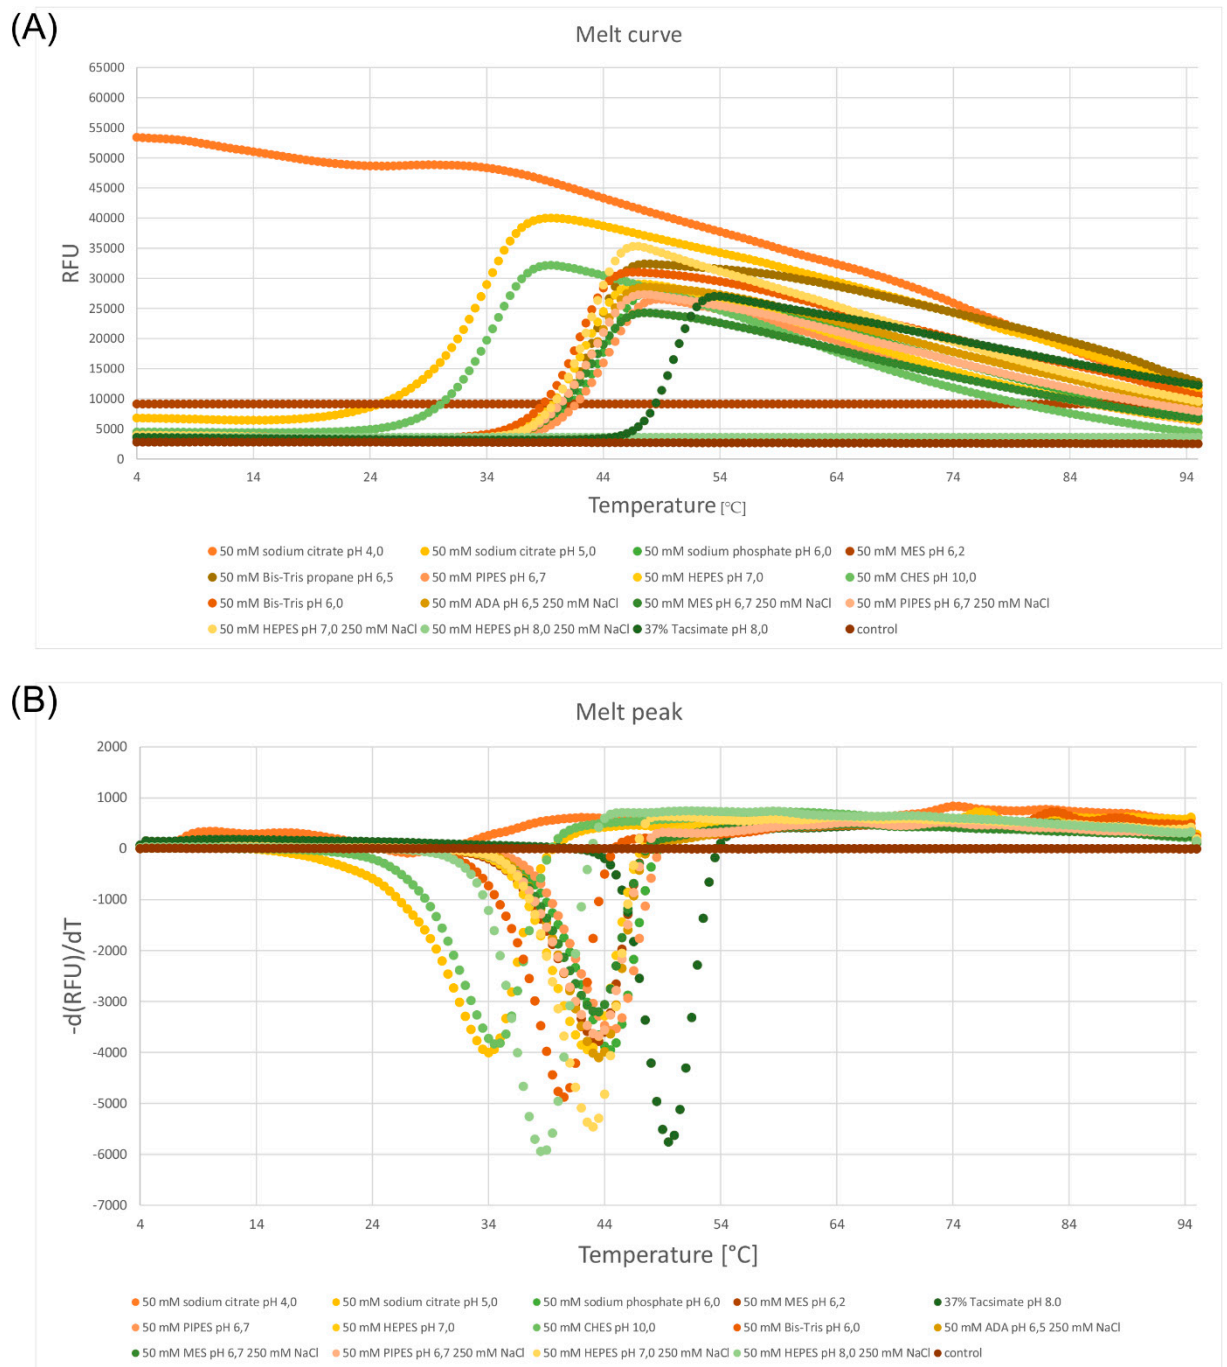

**Figure S2.** Selected TSA data and analysis for Arth $\beta$ DG\_E517Q mutant. (A) ThermoFluor-based protein-unfolding curves of Arth $\beta$ DG\_E517Q. (B) The melting peak  $T_m$  identified by plotting the first derivative of the fluorescence emission as a function of temperature ( $-d(\text{RFU})/dT$ ).
